# Supplementary material for: Propagation of seminal toxins through binary expression gene drives could suppress populations
Source: PubMed Central journal article supplement (PMC9012762; doi:10.1038/s41598-022-10327-4), 2022-04-15
Supplement: 41598_2022_10327_MOESM1_ESM.pdf [file 41598_2022_10327_MOESM1_ESM.pdf]

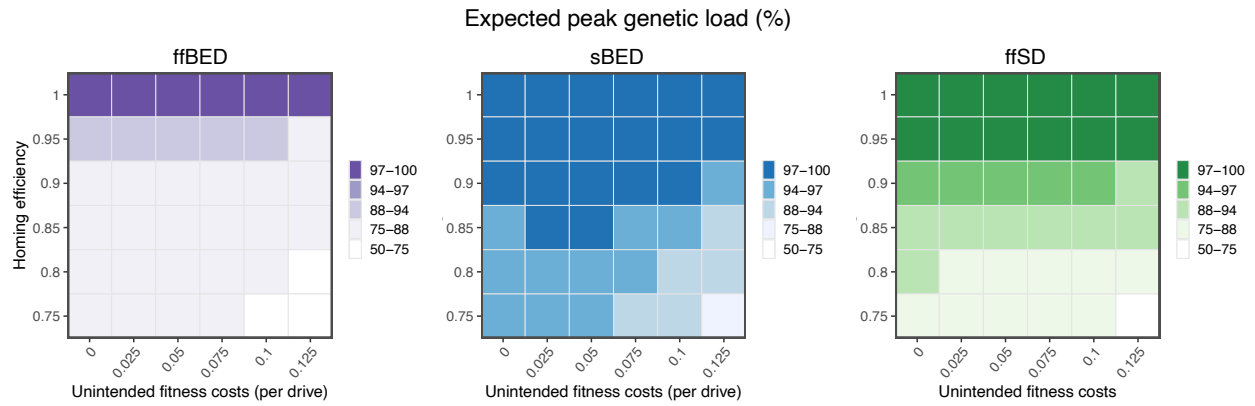

**Fig. S1** Peak genetic load imposed by ffBED, sBED, and ffSD as a function of *Homing efficiency* and *Unintended fitness costs*. The expected peak genetic load was estimated, for each drive design, as the maximum averaged-across-simulations genetic load observed among adult genotypes within 36 generations.

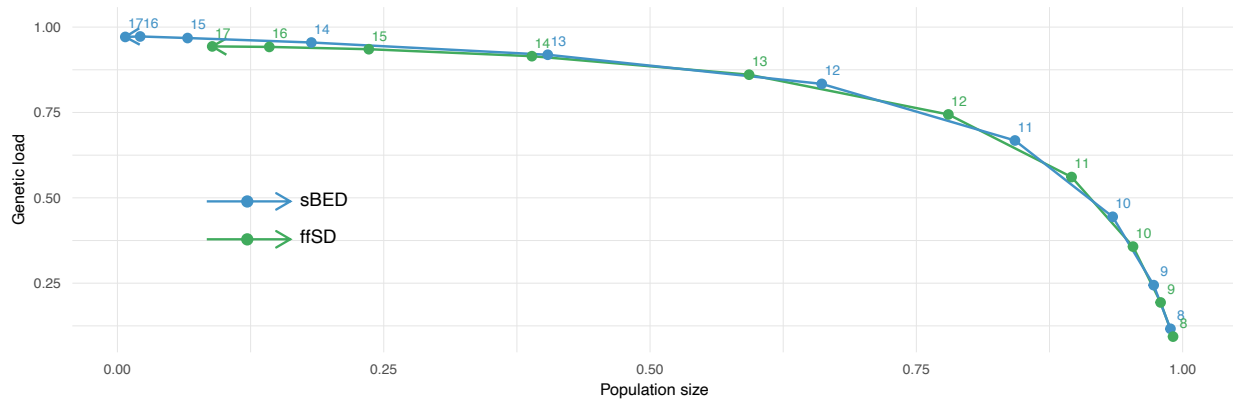

**Fig. S2** Relationship between the observed genetic load and the relative population size across generations 8 to 17, where changes in population size mainly occur, for sBED and ffSD. Numbers stand for generations and points represent values averaged across the 100 performed simulations.

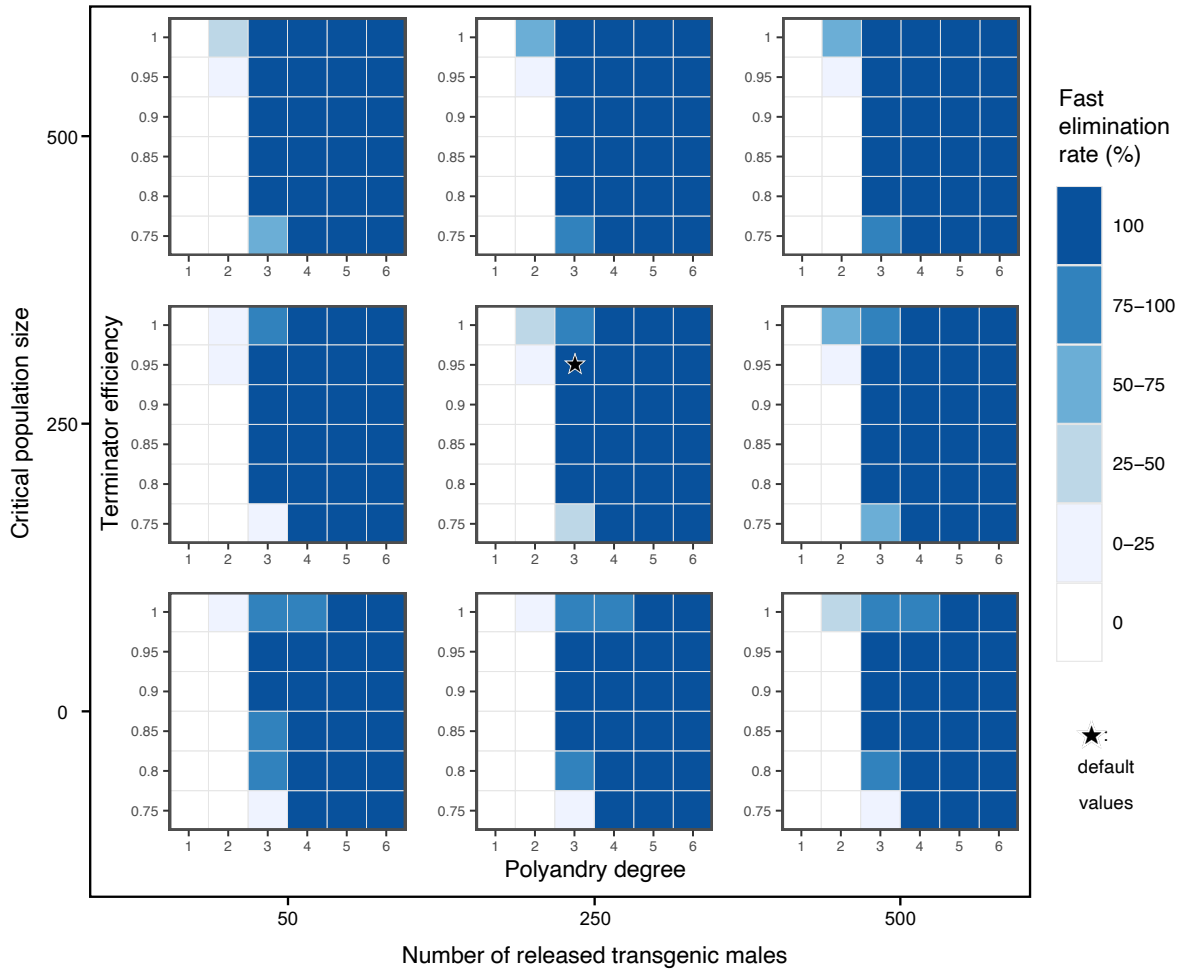

**Fig. S3 Fast elimination rate of sBED for a combined space of multiple parameters.** The percentage of simulations where the population was eliminated within 36 generations is shown for varying values of the following parameters: *Polyandry degree*, *Terminator efficiency*, *Release size* (the number of released males per drive), and *Critical population size*.

**Table S1 Fast elimination rate of ffsd for a combined space of *Release size* (the number of released males per drive) and *Critical population size*.**

| Critical population size | Number of released transgenic males |     |      |
|--------------------------|-------------------------------------|-----|------|
|                          | 100                                 | 500 | 1000 |
| 500                      | 95%                                 | 99% | 99%  |
| 250                      | 91%                                 | 97% | 97%  |
| 0                        | 82%                                 | 85% | 83%  |

**Table S2 Versions of the implemented softwares.**

| Software | Version |
|----------|---------|
| R core   | 4.0.0   |
| ggplot2  | 3.3.5   |
| logger   | 0.2.0   |
| bettermc | 1.1.1   |
| dplyr    | 1.0.7   |
| rlist    | 0.4.6.1 |
| zeallot  | 0.1.0   |
| stringr  | 1.4.0   |
